# Supplementary material for: Widespread promoter methylation of synaptic plasticity genes in long-term potentiation in the adult brain in vivo
Source: PubMed Central journal article supplement (PMC5364592; doi:10.1186/s12864-017-3621-x), 2017-03-23
Supplement: 12864_2017_3621_MOESM1_ESM.pdf [file 12864_2017_3621_MOESM1_ESM.pdf]

**a**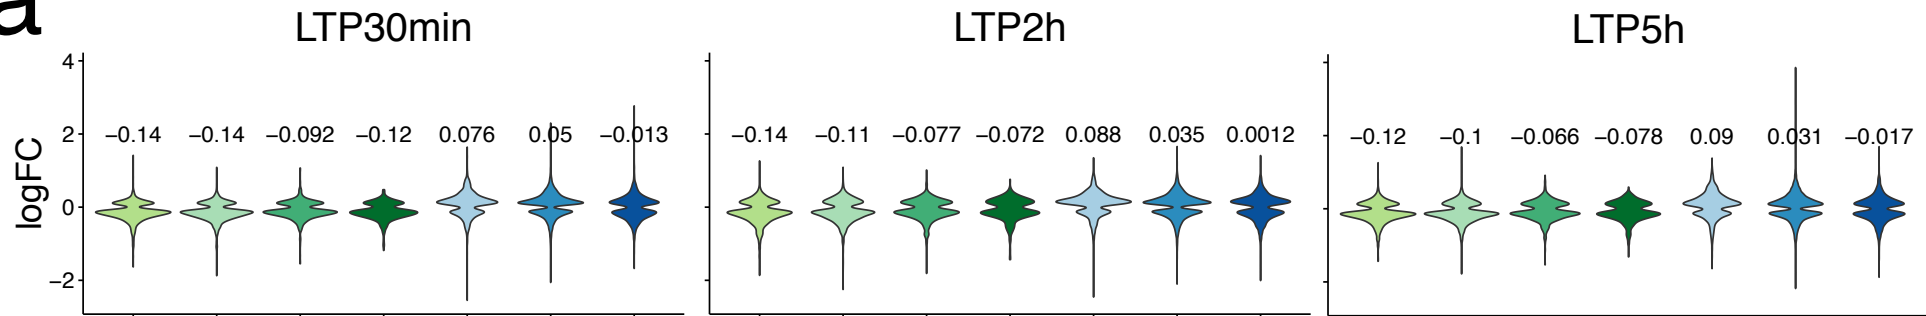**b**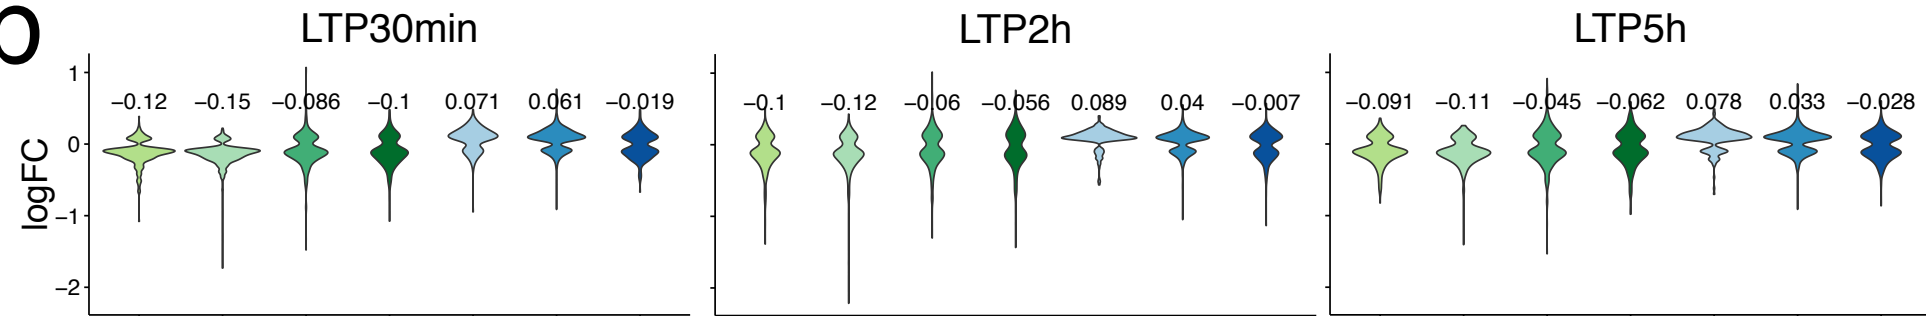

Class  CpG  CpG-Promoter  CpG-Shores  CpG-Shores-Promoter  Promoter  Shores  Shores-Promoter
